# Supplementary material for: Spinal Cord Injury: The Global Incidence, Prevalence, and Disability From the Global Burden of Disease Study 2019
Source: PubMed Central journal article supplement — Spine (Phila Pa 1976). 2022 Jun 30;47(21):1532–40. doi: 10.1097/BRS.0000000000004417 (PMC9554757; doi:10.1097/brs.0000000000004417), 2022-06-30

Supplemental Digital Content 4. Age standardized incidence rate, prevalence rate and YLD rate of spinal cord injury by three leading causes from 1990 to 2019. YLD, years lived with disability.

Conflict and terrorism Falls Road injuries

**A**

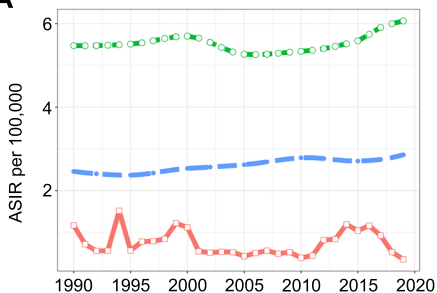

**B**

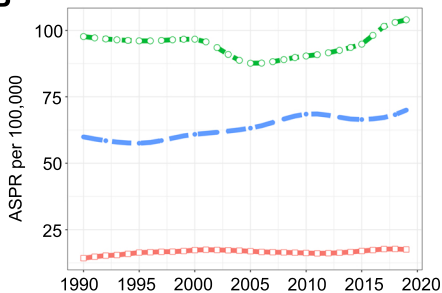

**C**

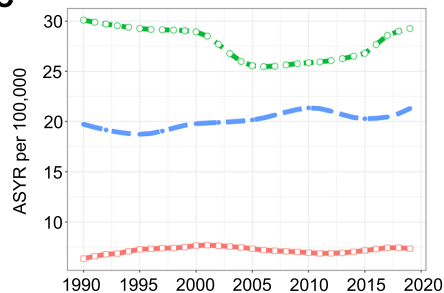

Supplement: brs-47-1532-s004.pdf [file brs-47-1532-s004.pdf]
