# Supplementary material for: Spinal Cord Injury: The Global Incidence, Prevalence, and Disability From the Global Burden of Disease Study 2019
Source: PubMed Central journal article supplement — Spine (Phila Pa 1976). 2022 Jun 30;47(21):1532–40. doi: 10.1097/BRS.0000000000004417 (PMC9554757; doi:10.1097/brs.0000000000004417), 2022-06-30

Supplemental Digital Content 6. Age standardized prevalence rate of spinal cord injury by sexes and injury sites from 1990 to 2019. YLD, years lived with disability.

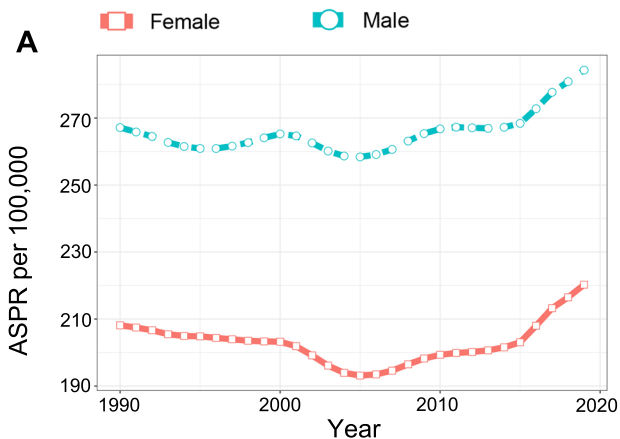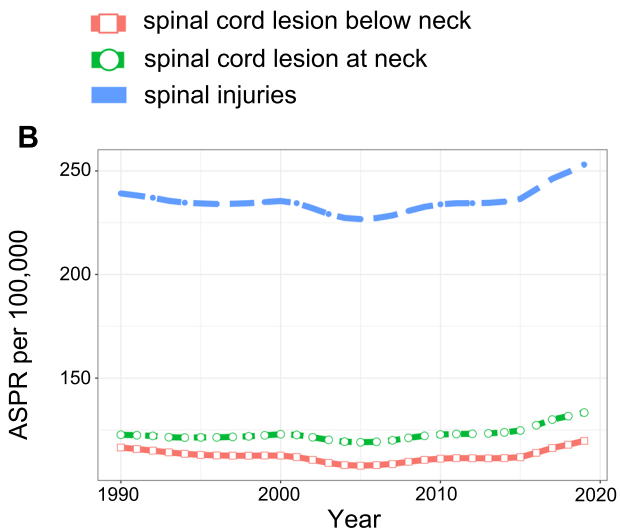

Supplement: brs-47-1532-s006.pdf [file brs-47-1532-s006.pdf]
