# Supplementary figures and images for: Spinal Cord Injury: The Global Incidence, Prevalence, and Disability From the Global Burden of Disease Study 2019
Source: PubMed Central journal article supplement — Spine (Phila Pa 1976). 2022 Jun 30;47(21):1532–40. doi: 10.1097/BRS.0000000000004417 (PMC9554757; doi:10.1097/brs.0000000000004417), 2022-06-30

- High-middle SDI
- High SDI
- Low-middle SDI
- Low SDI
- Middle SDI

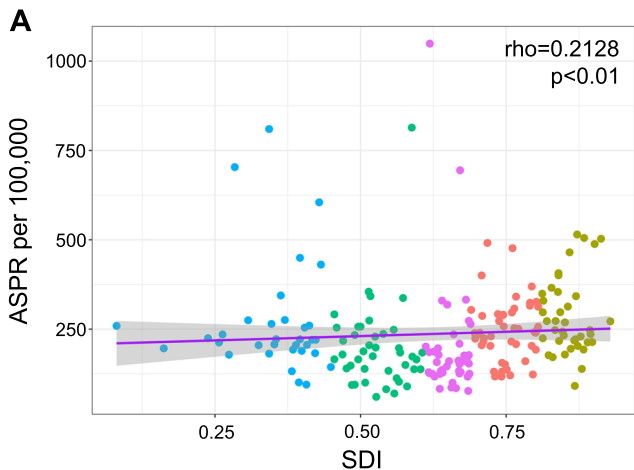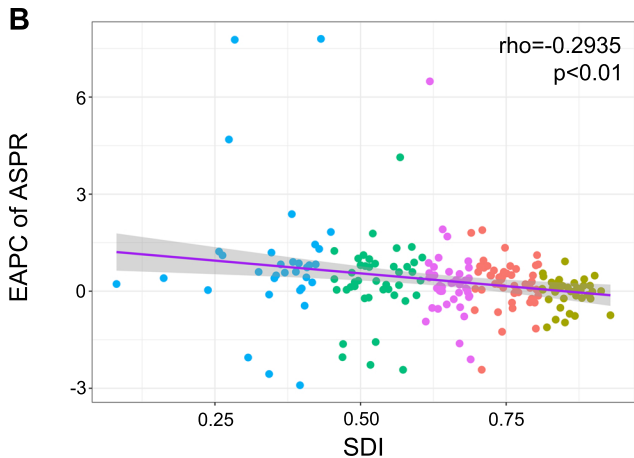

Supplement: brs-47-1532-s005.pdf [file brs-47-1532-s005.pdf]
